# Supplementary material
Source: PubMed Central journal article supplement (PMC2952357)
Supplement: NIHMS231763-supplement-01.pdf [file NIHMS231763-supplement-01.pdf]

Table S1.

**Species-level bacterial phylotypes identified from 16S rRNA-based analyses as significantly different in their proportional representation in the fecal microbiota of TRUC versus *Rag2*<sup>-/-</sup> mice.**

Supplemental material for Fig. 1

Table S2.

**Table S2. All bacterial species identified in the culture-dependent time course screen of *Rag2*<sup>-/-</sup> and TRUC fecal microbiota**

Supplemental material for Fig. 2

Supplemental Fig. 1

**Dextran sulfate sodium does not alter fecal levels of culturable *Klebsiella pneumoniae* and *Proteus mirabilis* in *Rag2*<sup>-/-</sup> and WT mice.**

These data support the results in the paper (e.g. Fig. 2 and Fig. 3) that WT and *Rag2*<sup>-/-</sup> mice do not have live recoverable *K. pneumoniae* or *P. mirabilis* in their fecal material (at our detection limit) even in response to the colitogenic, mucosal disruptant, dextran sulfate sodium. Thus the presence of these Enterobacteriaceae in TRUC mice is not solely attributable to the presence of colonic inflammation (an observation also supported by Fig. 4).

Supplemental Fig. 2

**Colitis scores for *Rag2*<sup>-/-</sup> and WT cross-fostered TRUC mice.**

These data are the colitis scores for a sub-set of mice in Fig. 3B.

Supplemental Fig. 3

**Histologic colitis scores for anti-TNF- $\alpha$  and T-regulatory cell infused TRUC mice off-therapy.**

These data are the colitis scores for the mice in the experiments in Fig. 4.

Supplemental Fig. 4.

**TNF- $\alpha$  does not affect the growth kinetics of *Klebsiella pneumoniae* or *Proteus mirabilis* cultured *in vitro***

These data supplement the data in Fig. 4 and demonstrate that the observed effects in Fig. 4 are not simply attributable to a direct effect of TNF- $\alpha$  on bacterial growth kinetics.

**Fig. S5.**

**Increased pro-inflammatory cytokines in TRUC vs *Rag2*<sup>-/-</sup> milk.**

These data seek to address the contribution of non-microbial maternal/foster-related environmental factors that may impact microbial colonization of the gut post-natally. These data supplement interpretation of data in Fig. 1 and Fig. 3.

**Table S1. Species-level bacterial phylotypes identified from 16S rRNA-based analyses as significantly different in their proportional representation in the fecal microbiota of TRUC versus Rag2<sup>-/-</sup> animals.**

| Phylotype Identification Number | Taxonomic assignment                                                               | T-bet <sup>-/-</sup> /Rag2 <sup>-/-</sup> (TRUC) mice<br>Relative abundance of phylotype, %<br>average ± SEM * | Rag2 <sup>-/-</sup> mice<br>Relative abundance of phylotype, %<br>average ± SEM | Mann-Whitney U | P value  | P value with Bonferroni-correction ** | P value with FDR correction |
|---------------------------------|------------------------------------------------------------------------------------|----------------------------------------------------------------------------------------------------------------|---------------------------------------------------------------------------------|----------------|----------|---------------------------------------|-----------------------------|
| otu_107                         | Actinobacteria;Actinobacteria;Coriobacteriales;Coriobacteriaceae;Coriobacterium    | 0.01 ± 0.01                                                                                                    | 0.17 ± 0.06                                                                     | 37             | 2.17E-04 | 7.00E-01                              | 3.33E-02                    |
| otu_464                         | Bacteroidetes                                                                      | 1.88 ± 0.48                                                                                                    | 0.01 ± 0.01                                                                     | 1              | 8.01E-07 | 2.59E-03                              | 2.59E-03                    |
| otu_807                         | Bacteroidetes                                                                      | 0.38 ± 0.14                                                                                                    | 0.00 ± 0.00                                                                     | 16             | 3.59E-06 | 1.16E-02                              | 2.90E-03                    |
| otu_126                         | Bacteroidetes                                                                      | 0.24 ± 0.05                                                                                                    | 0.02 ± 0.01                                                                     | 13.5           | 7.20E-06 | 2.32E-02                              | 3.32E-03                    |
| otu_1090                        | Bacteroidetes                                                                      | 0.71 ± 0.20                                                                                                    | 0.00 ± 0.00                                                                     | 18             | 1.03E-05 | 3.32E-02                              | 3.69E-03                    |
| otu_1947                        | Bacteroidetes                                                                      | 0.17 ± 0.03                                                                                                    | 0.00 ± 0.00                                                                     | 25.5           | 2.24E-05 | 7.25E-02                              | 3.45E-03                    |
| otu_842                         | Bacteroidetes                                                                      | 0.11 ± 0.03                                                                                                    | 0.00 ± 0.00                                                                     | 32             | 1.49E-05 | 1.33E-01                              | 5.36E-03                    |
| otu_2027                        | Bacteroidetes                                                                      | 0.01 ± 0.01                                                                                                    | 0.58 ± 0.14                                                                     | 31             | 8.02E-05 | 2.59E-01                              | 1.23E-02                    |
| otu_572                         | Bacteroidetes                                                                      | 0.23 ± 0.05                                                                                                    | 0.02 ± 0.02                                                                     | 30             | 8.58E-05 | 2.77E-01                              | 1.32E-02                    |
| otu_1544                        | Bacteroidetes                                                                      | 0.31 ± 0.14                                                                                                    | 0.00 ± 0.00                                                                     | 40             | 9.92E-05 | 3.20E-01                              | 1.53E-02                    |
| otu_3215                        | Bacteroidetes                                                                      | 0.76 ± 0.30                                                                                                    | 0.00 ± 0.00                                                                     | 40             | 9.92E-05 | 3.20E-01                              | 1.53E-02                    |
| otu_823                         | Bacteroidetes                                                                      | 0.12 ± 0.03                                                                                                    | 0.00 ± 0.00                                                                     | 40             | 9.92E-05 | 3.20E-01                              | 1.53E-02                    |
| otu_870                         | Bacteroidetes                                                                      | 0.13 ± 0.04                                                                                                    | 0.00 ± 0.00                                                                     | 40             | 9.92E-05 | 3.20E-01                              | 1.53E-02                    |
| otu_893                         | Bacteroidetes                                                                      | 0.09 ± 0.02                                                                                                    | 0.00 ± 0.00                                                                     | 40             | 9.92E-05 | 3.20E-01                              | 1.53E-02                    |
| otu_1598                        | Bacteroidetes                                                                      | 0.45 ± 0.17                                                                                                    | 0.00 ± 0.00                                                                     | 42.5           | 2.30E-04 | 7.42E-01                              | 3.53E-02                    |
| otu_3100                        | Bacteroidetes                                                                      | 0.46 ± 0.18                                                                                                    | 0.00 ± 0.00                                                                     | 48             | 2.67E-04 | 8.61E-01                              | 4.10E-02                    |
| otu_814                         | Bacteroidetes                                                                      | 0.18 ± 0.10                                                                                                    | 0.00 ± 0.00                                                                     | 48             | 2.67E-04 | 8.61E-01                              | 4.10E-02                    |
| otu_110                         | Bacteroidetes;Bacteroidetes;Bacteroidales                                          | 0.66 ± 0.17                                                                                                    | 0.03 ± 0.01                                                                     | 10.5           | 5.90E-06 | 1.91E-02                              | 3.18E-03                    |
| otu_846                         | Bacteroidetes;Bacteroidetes;Bacteroidales                                          | 0.33 ± 0.08                                                                                                    | 0.00 ± 0.00                                                                     | 32             | 3.49E-05 | 1.33E-01                              | 5.36E-03                    |
| otu_1459                        | Bacteroidetes;Bacteroidetes;Bacteroidales;Bacteroidaceae;Bacteroides               | 0.21 ± 0.05                                                                                                    | 0.00 ± 0.00                                                                     | 9.5            | 2.00E-06 | 6.46E-03                              | 2.15E-03                    |
| otu_386                         | Bacteroidetes;Bacteroidetes;Bacteroidales;Bacteroidaceae;Bacteroides               | 1.44 ± 0.53                                                                                                    | 0.25 ± 0.23                                                                     | 8              | 4.80E-06 | 1.55E-02                              | 3.10E-03                    |
| otu_1476                        | Bacteroidetes;Bacteroidetes;Bacteroidales;Bacteroidaceae;Bacteroides               | 0.14 ± 0.03                                                                                                    | 0.00 ± 0.00                                                                     | 24             | 1.16E-05 | 3.73E-02                              | 3.11E-03                    |
| otu_225                         | Bacteroidetes;Bacteroidetes;Bacteroidales;Bacteroidaceae;Bacteroides               | 0.27 ± 0.06                                                                                                    | 0.01 ± 0.01                                                                     | 19             | 1.24E-05 | 4.00E-02                              | 2.50E-03                    |
| otu_1115                        | Bacteroidetes;Bacteroidetes;Bacteroidales;Bacteroidaceae;Bacteroides               | 0.15 ± 0.04                                                                                                    | 0.00 ± 0.00                                                                     | 32             | 1.49E-05 | 1.33E-01                              | 5.36E-03                    |
| otu_1552                        | Bacteroidetes;Bacteroidetes;Bacteroidales;Bacteroidaceae;Bacteroides               | 0.10 ± 0.03                                                                                                    | 0.00 ± 0.00                                                                     | 32             | 1.49E-05 | 1.33E-01                              | 5.36E-03                    |
| otu_1042                        | Bacteroidetes;Bacteroidetes;Bacteroidales;Bacteroidaceae;Bacteroides               | 0.11 ± 0.03                                                                                                    | 0.00 ± 0.00                                                                     | 40             | 9.92E-05 | 3.20E-01                              | 1.53E-02                    |
| otu_1130                        | Bacteroidetes;Bacteroidetes;Bacteroidales;Bacteroidaceae;Bacteroides               | 0.07 ± 0.03                                                                                                    | 0.00 ± 0.00                                                                     | 40             | 9.92E-05 | 3.20E-01                              | 1.53E-02                    |
| otu_675                         | Bacteroidetes;Bacteroidetes;Bacteroidales;Bacteroidaceae;Bacteroides               | 0.20 ± 0.04                                                                                                    | 0.20 ± 0.20                                                                     | 33             | 1.41E-04 | 4.55E-01                              | 2.16E-02                    |
| otu_812                         | Bacteroidetes;Bacteroidetes;Bacteroidales;Porphyromonadaceae;Parabacteroides       | 0.36 ± 0.07                                                                                                    | 0.00 ± 0.00                                                                     | 8              | 1.04E-06 | 3.36E-03                              | 1.68E-03                    |
| otu_1998                        | Bacteroidetes;Bacteroidetes;Bacteroidales;Porphyromonadaceae;Parabacteroides       | 0.17 ± 0.05                                                                                                    | 0.00 ± 0.00                                                                     | 24             | 1.16E-05 | 3.73E-02                              | 2.87E-03                    |
| otu_1496                        | Bacteroidetes;Bacteroidetes;Bacteroidales;Porphyromonadaceae;Parabacteroides       | 0.14 ± 0.04                                                                                                    | 0.00 ± 0.00                                                                     | 40             | 9.92E-05 | 3.20E-01                              | 1.53E-02                    |
| otu_1288                        | Bacteroidetes;Bacteroidetes;Bacteroidales;Rikenellaceae;Allostepes                 | 0.02 ± 0.01                                                                                                    | 0.29 ± 0.06                                                                     | 16             | 1.79E-05 | 5.79E-02                              | 3.04E-03                    |
| otu_1283                        | Bacteroidetes;Bacteroidetes;Bacteroidales;Rikenellaceae;Allostepes                 | 0.06 ± 0.03                                                                                                    | 0.45 ± 0.09                                                                     | 32             | 2.39E-04 | 7.71E-01                              | 3.67E-02                    |
| otu_1466                        | Bacteroidetes;Bacteroidetes;Bacteroidales;Rikenellaceae;Allostepes                 | 0.21 ± 0.09                                                                                                    | 0.00 ± 0.00                                                                     | 48             | 2.67E-04 | 8.61E-01                              | 4.10E-02                    |
| otu_1418                        | Firmicutes                                                                         | 0.56 ± 0.17                                                                                                    | 0.07 ± 0.07                                                                     | 22             | 2.70E-05 | 8.72E-02                              | 4.15E-03                    |
| otu_3769                        | Firmicutes                                                                         | 0.00 ± 0.00                                                                                                    | 0.06 ± 0.03                                                                     | 48             | 2.67E-04 | 8.61E-01                              | 4.10E-02                    |
| otu_2410                        | Firmicutes;Bacilli;Lactobacillales;Lactobacillaceae;Lactobacillus                  | 10.01 ± 2.67                                                                                                   | 0.98 ± 0.39                                                                     | 14             | 1.89E-05 | 6.09E-02                              | 3.04E-03                    |
| otu_1921                        | Firmicutes;Bacilli;Lactobacillales;Lactobacillaceae;Lactobacillus                  | 1.64 ± 1.48                                                                                                    | 0.32 ± 0.32                                                                     | 29             | 7.25E-05 | 2.34E-01                              | 1.12E-02                    |
| otu_829                         | Firmicutes;Clostridia;Clostridiales                                                | 0.29 ± 0.09                                                                                                    | 0.00 ± 0.00                                                                     | 24             | 1.16E-05 | 3.73E-02                              | 3.39E-03                    |
| otu_105                         | Firmicutes;Clostridia;Clostridiales                                                | 0.00 ± 0.00                                                                                                    | 0.17 ± 0.04                                                                     | 27             | 4.00E-05 | 1.29E-01                              | 6.16E-03                    |
| otu_470                         | Firmicutes;Clostridia;Clostridiales                                                | 0.01 ± 0.01                                                                                                    | 0.18 ± 0.06                                                                     | 27             | 4.00E-05 | 1.29E-01                              | 6.16E-03                    |
| otu_276                         | Firmicutes;Clostridia;Clostridiales                                                | 0.04 ± 0.02                                                                                                    | 0.33 ± 0.06                                                                     | 25             | 8.03E-05 | 2.59E-01                              | 1.24E-02                    |
| otu_178                         | Firmicutes;Clostridia;Clostridiales                                                | 0.01 ± 0.01                                                                                                    | 0.53 ± 0.24                                                                     | 35             | 8.87E-05 | 2.86E-01                              | 1.36E-02                    |
| otu_2                           | Firmicutes;Clostridia;Clostridiales                                                | 0.07 ± 0.03                                                                                                    | 0.73 ± 0.23                                                                     | 24.5           | 9.13E-05 | 2.95E-01                              | 1.40E-02                    |
| otu_7                           | Firmicutes;Clostridia;Clostridiales                                                | 0.00 ± 0.00                                                                                                    | 0.49 ± 0.34                                                                     | 40             | 9.92E-05 | 3.20E-01                              | 1.53E-02                    |
| otu_169                         | Firmicutes;Clostridia;Clostridiales                                                | 0.05 ± 0.02                                                                                                    | 0.25 ± 0.05                                                                     | 30.5           | 2.29E-04 | 7.40E-01                              | 3.53E-02                    |
| otu_1304                        | Firmicutes;Clostridia;Clostridiales                                                | 0.00 ± 0.00                                                                                                    | 0.06 ± 0.02                                                                     | 48             | 2.67E-04 | 8.61E-01                              | 4.10E-02                    |
| otu_14                          | Firmicutes;Clostridia;Clostridiales;Lachnospiraceae                                | 0.04 ± 0.02                                                                                                    | 0.40 ± 0.08                                                                     | 13             | 1.18E-05 | 3.79E-02                              | 2.71E-03                    |
| otu_33                          | Firmicutes;Clostridia;Clostridiales;Lachnospiraceae                                | 0.01 ± 0.01                                                                                                    | 0.52 ± 0.14                                                                     | 19             | 1.24E-05 | 4.00E-02                              | 2.67E-03                    |
| otu_52                          | Firmicutes;Clostridia;Clostridiales;Lachnospiraceae                                | 0.13 ± 0.05                                                                                                    | 1.02 ± 0.14                                                                     | 13             | 1.37E-05 | 4.42E-02                              | 2.45E-03                    |
| otu_205                         | Firmicutes;Clostridia;Clostridiales;Lachnospiraceae                                | 0.01 ± 0.00                                                                                                    | 0.15 ± 0.03                                                                     | 21             | 2.26E-05 | 7.31E-02                              | 3.48E-03                    |
| otu_58                          | Firmicutes;Clostridia;Clostridiales;Lachnospiraceae                                | 0.00 ± 0.00                                                                                                    | 0.12 ± 0.06                                                                     | 32             | 3.49E-05 | 1.33E-01                              | 5.36E-03                    |
| otu_1777                        | Firmicutes;Clostridia;Clostridiales;Lachnospiraceae                                | 0.05 ± 0.03                                                                                                    | 0.26 ± 0.04                                                                     | 21             | 4.18E-05 | 1.35E-01                              | 6.43E-03                    |
| otu_2407                        | Firmicutes;Clostridia;Clostridiales;Lachnospiraceae                                | 0.01 ± 0.00                                                                                                    | 0.11 ± 0.02                                                                     | 32.5           | 1.30E-04 | 4.19E-01                              | 2.00E-02                    |
| otu_175                         | Firmicutes;Clostridia;Clostridiales;Lachnospiraceae                                | 0.01 ± 0.01                                                                                                    | 0.14 ± 0.04                                                                     | 41             | 2.47E-04 | 7.97E-01                              | 3.80E-02                    |
| otu_1298                        | Firmicutes;Clostridia;Clostridiales;Lachnospiraceae                                | 0.00 ± 0.00                                                                                                    | 0.07 ± 0.02                                                                     | 43.5           | 2.72E-04 | 8.79E-01                              | 4.18E-02                    |
| otu_1                           | Firmicutes;Clostridia;Clostridiales;Lachnospiraceae;Lachnospiraceae;Incertae Sedis | 0.27 ± 0.09                                                                                                    | 1.46 ± 0.16                                                                     | 15             | 2.22E-05 | 7.17E-02                              | 3.41E-03                    |
| otu_1934                        | Firmicutes;Clostridia;Clostridiales;Lachnospiraceae;Lachnospiraceae;Incertae Sedis | 0.38 ± 0.10                                                                                                    | 0.02 ± 0.02                                                                     | 33             | 1.12E-04 | 3.63E-01                              | 1.73E-02                    |
| otu_79                          | Firmicutes;Clostridia;Clostridiales;Lachnospiraceae;Lachnospiraceae;Incertae Sedis | 0.06 ± 0.03                                                                                                    | 0.28 ± 0.04                                                                     | 27             | 1.28E-04 | 4.14E-01                              | 1.97E-02                    |
| otu_173                         | Firmicutes;Clostridia;Clostridiales;Lachnospiraceae;Roseburia                      | 0.00 ± 0.00                                                                                                    | 0.11 ± 0.02                                                                     | 25.5           | 2.24E-05 | 7.25E-02                              | 3.45E-03                    |
| otu_10                          | Firmicutes;Clostridia;Clostridiales;Ruminococcaceae                                | 0.19 ± 0.10                                                                                                    | 2.09 ± 0.34                                                                     | 11             | 9.00E-06 | 2.91E-02                              | 3.63E-03                    |
| otu_12                          | Firmicutes;Clostridia;Clostridiales;Ruminococcaceae                                | 0.03 ± 0.03                                                                                                    | 0.63 ± 0.14                                                                     | 18             | 1.32E-05 | 4.27E-02                              | 2.51E-03                    |
| otu_2017                        | Unclassified Bacteria                                                              | 0.20 ± 0.05                                                                                                    | 0.00 ± 0.00                                                                     | 20             | 1.12E-05 | 3.60E-02                              | 3.60E-03                    |
| otu_1190                        | Unclassified Bacteria                                                              | 0.24 ± 0.07                                                                                                    | 0.00 ± 0.00                                                                     | 32             | 3.49E-05 | 1.33E-01                              | 5.36E-03                    |
| otu_1980                        | Unclassified Bacteria                                                              | 0.36 ± 0.10                                                                                                    | 0.00 ± 0.00                                                                     | 32             | 3.49E-05 | 1.33E-01                              | 5.36E-03                    |
| otu_1149                        | Unclassified Bacteria                                                              | 0.10 ± 0.03                                                                                                    | 0.00 ± 0.00                                                                     | 40             | 9.92E-05 | 3.20E-01                              | 1.53E-02                    |
| otu_658                         | Unclassified Bacteria                                                              | 0.24 ± 0.07                                                                                                    | 0.02 ± 0.02                                                                     | 40             | 2.08E-04 | 6.75E-01                              | 3.22E-02                    |
| otu_1475                        | Unclassified Bacteria                                                              | 0.80 ± 0.31                                                                                                    | 0.00 ± 0.00                                                                     | 48             | 2.67E-04 | 8.61E-01                              | 4.10E-02                    |
| otu_2816                        | Unclassified Bacteria                                                              | 0.27 ± 0.06                                                                                                    | 0.04 ± 0.03                                                                     | 39             | 2.98E-04 | 9.63E-01                              | 4.59E-02                    |

For each phylotype, a taxonomic assignment based on the RDP classifier implemented in QIIME software (<http://sourceforge.net/projects/qiime/>) is shown, followed by the average proportional representation of that phylotype in the fecal microbiota of TRUC (T-bet<sup>-/-</sup> + Rag2<sup>-/-</sup>) and Rag2<sup>-/-</sup> mice (n=16 fecal samples from 4 mice per genotype). \*Relative abundance as % of assigned bacterial 16S rRNA gene sequences for each sample. \*\*A total of 3,229 species-level OTUs were identified among all fecal microbiota surveyed, but only the 69 shown here passed the threshold FDR-corrected value of p<0.05.

Table S2. All species identified in the culture-dependent time course screen of *Rag2*<sup>-/-</sup> and TRUC

| Bacterial Species                          |                                   |             | # <i>Rag2</i> <sup>-/-</sup> offspring |      | # TRUC offspring * |      |       |  |
|--------------------------------------------|-----------------------------------|-------------|----------------------------------------|------|--------------------|------|-------|--|
|                                            | <i>Rag2</i> <sup>-/-</sup> Mother | TRUC Mother | 2 wk                                   | 4 wk | 6 wk               | 8 wk | 10 wk |  |
| <i>Acinetobacter baumannii</i>             | +                                 | -           | 0 0                                    | 0 0  | 0 0                | 0 0  | 0 0   |  |
| <i>Actinomyces</i> sp.                     | +                                 | -           | 0 0                                    | 0 0  | 0 0                | 0 0  | 0 0   |  |
| <i>Bacteroides distasonis</i>              | -                                 | +           | 0 3                                    | 0 1  | 0 2                | 1 3  | 0 0   |  |
| <i>Bacteroides fragilis</i>                | -                                 | -           | 1 0                                    | 0 0  | 0 0                | 0 0  | 0 0   |  |
| <i>Bacteroides ovatus</i>                  | -                                 | -           | 0 1                                    | 0 0  | 0 0                | 0 0  | 0 0   |  |
| <i>Bacteroides putredinis</i>              | -                                 | -           | 0 0                                    | 0 0  | 1 0                | 0 0  | 0 0   |  |
| <i>Bacteroides thetaiotaomicron</i>        | -                                 | -           | 0 2                                    | 0 1  | 0 0                | 0 0  | 0 0   |  |
| <i>Bacteroides urealyticus</i>             | -                                 | -           | 0 0                                    | 0 0  | 0 0                | 0 0  | 0 1   |  |
| <i>Bacteroides vulgatus</i>                | +                                 | +           | 2 3                                    | 2 3  | 3 2                | 3 2  | 0 0   |  |
| <i>Campylobacter gracilis</i>              | -                                 | -           | 0 0                                    | 2 1  | 0 2                | 2 2  | 1 0   |  |
| <i>Clostridium clostridioforme</i>         | -                                 | +           | 0 3                                    | 0 0  | 0 0                | 0 0  | 0 0   |  |
| <i>Clostridium hastiforme</i>              | +                                 | -           | 0 0                                    | 0 0  | 0 0                | 0 0  | 0 0   |  |
| <i>Comamonas testosteroni</i>              | -                                 | -           | 1 0                                    | 0 0  | 0 0                | 0 0  | 0 0   |  |
| <i>Corynebacterium pseudodiphtherium</i>   | -                                 | -           | 0 0                                    | 0 0  | 0 0                | 0 0  | 0 1   |  |
| <i>Enterococcus casseliflavus</i>          | -                                 | -           | 0 0                                    | 0 0  | 3 0                | 3 2  | 0 0   |  |
| <i>Enterococcus faecalis</i>               | -                                 | -           | 0 1                                    | 0 0  | 0 0                | 0 0  | 0 0   |  |
| <i>Enterococcus gallinarum</i>             | -                                 | -           | 1 0                                    | 2 2  | 0 0                | 0 1  | 3 3   |  |
| <i>Escherichia coli</i>                    | +                                 | -           | 3 3                                    | 3 3  | 3 3                | 3 3  | 3 3   |  |
| <i>Eubacterium bifforme</i>                | -                                 | -           | 0 1                                    | 0 0  | 0 0                | 0 0  | 0 0   |  |
| <i>Eubacterium lentum</i>                  | -                                 | -           | 1 0                                    | 0 0  | 0 0                | 0 0  | 0 0   |  |
| <i>Eubacterium</i> sp.                     | -                                 | -           | 0 0                                    | 0 0  | 0 0                | 1 0  | 0 0   |  |
| <i>Fusobacterium mortiferum</i>            | -                                 | -           | 0 0                                    | 0 0  | 0 2                | 0 0  | 0 0   |  |
| <i>Gemella morbillorum</i>                 | -                                 | -           | 0 0                                    | 3 3  | 0 0                | 1 3  | 0 3   |  |
| <i>Klebsiella pneumoniae</i>               | -                                 | +           | 0 0                                    | 0 3  | 0 3                | 0 2  | 0 1   |  |
| <i>Lactobacillus alimentarius</i>          | -                                 | -           | 0 0                                    | 0 0  | 0 1                | 0 0  | 0 0   |  |
| <i>Lactobacillus animalis</i>              | +                                 | +           | 3 3                                    | 2 3  | 3 3                | 2 3  | 3 3   |  |
| <i>Lactobacillus casei</i>                 | -                                 | -           | 1 0                                    | 0 0  | 0 0                | 0 0  | 0 0   |  |
| <i>Lactobacillus curvatus</i>              | +                                 | +           | 0 3                                    | 3 1  | 3 1                | 0 0  | 2 3   |  |
| <i>Lactobacillus delbrueckii-lactis</i>    | -                                 | -           | 0 0                                    | 1 0  | 0 0                | 0 0  | 0 0   |  |
| <i>Lactobacillus farciminis</i>            | -                                 | -           | 1 0                                    | 0 0  | 0 0                | 0 0  | 0 0   |  |
| <i>Lactobacillus leichmannii</i>           | -                                 | +           | 0 0                                    | 0 0  | 0 0                | 0 0  | 0 0   |  |
| <i>Lactobacillus</i> sp.                   | +                                 | +           | 2 2                                    | 0 0  | 0 0                | 0 1  | 0 0   |  |
| <i>Prevotella foeschei</i>                 | -                                 | -           | 0 0                                    | 0 0  | 0 1                | 0 0  | 0 0   |  |
| <i>Prevotella oralis</i> gp.               | +                                 | +           | 0 2                                    | 0 0  | 3 1                | 1 0  | 0 0   |  |
| <i>Prevotella</i> sp.                      | -                                 | +           | 0 0                                    | 0 0  | 0 0                | 0 0  | 0 0   |  |
| <i>Prevotella tannarae</i>                 | -                                 | +           | 0 1                                    | 0 3  | 0 3                | 0 3  | 0 0   |  |
| <i>Prevotella veroralis</i>                | +                                 | -           | 1 0                                    | 0 0  | 0 0                | 0 0  | 0 0   |  |
| <i>Propionibacterium-D06</i>               | -                                 | -           | 0 1                                    | 0 0  | 0 0                | 0 0  | 0 0   |  |
| <i>Proteus mirabilis</i>                   | -                                 | +           | 0 3                                    | 0 3  | 0 2                | 0 3  | 0 3   |  |
| <i>Pseudomonas fluorescens</i>             | -                                 | -           | 0 0                                    | 0 1  | 0 0                | 0 0  | 0 0   |  |
| <i>Pseudomonas putida</i>                  | +                                 | -           | 0 0                                    | 0 0  | 0 0                | 0 0  | 0 0   |  |
| <i>Ruminococcus</i> sp.                    | -                                 | -           | 0 0                                    | 3 2  | 0 0                | 0 0  | 0 0   |  |
| <i>Staphylococcus arlettae</i>             | -                                 | +           | 0 0                                    | 0 0  | 0 0                | 0 0  | 0 0   |  |
| <i>Staphylococcus capitis-capitis</i>      | -                                 | -           | 0 0                                    | 0 1  | 0 0                | 0 0  | 0 0   |  |
| <i>Staphylococcus chromogenes</i>          | -                                 | -           | 0 3                                    | 0 0  | 0 0                | 0 0  | 0 0   |  |
| <i>Staphylococcus cohnii - urealyticus</i> | -                                 | +           | 2 0                                    | 1 1  | 0 1                | 0 0  | 0 1   |  |
| <i>Staphylococcus hyicus</i>               | -                                 | -           | 0 0                                    | 0 1  | 0 0                | 0 0  | 0 0   |  |
| <i>Staphylococcus kloosii</i>              | -                                 | -           | 0 0                                    | 0 1  | 0 2                | 1 3  | 0 0   |  |
| <i>Staphylococcus lentus</i>               | -                                 | -           | 0 0                                    | 1 0  | 2 2                | 0 0  | 0 0   |  |
| <i>Staphylococcus lutrae</i>               | -                                 | +           | 0 0                                    | 0 0  | 0 0                | 0 0  | 0 0   |  |
| <i>Staphylococcus saprophyticus</i>        | -                                 | -           | 1 0                                    | 2 0  | 0 0                | 0 2  | 0 1   |  |
| <i>Staphylococcus sciuri</i>               | +                                 | -           | 0 0                                    | 1 0  | 0 0                | 0 0  | 2 0   |  |
| <i>Staphylococcus xylosum</i>              | +                                 | -           | 2 0                                    | 1 1  | 2 0                | 3 3  | 1 2   |  |
| <i>Streptococcus anginosus</i> gp.         | -                                 | +           | 0 0                                    | 3 3  | 0 1                | 0 0  | 0 0   |  |
| <i>Streptococcus bovis</i>                 | +                                 | -           | 0 0                                    | 0 0  | 0 2                | 0 0  | 0 0   |  |
| <i>Streptococcus intermedius</i>           | -                                 | -           | 0 0                                    | 0 0  | 0 0                | 0 0  | 3 0   |  |
| <i>Streptococcus oralis</i>                | -                                 | -           | 0 0                                    | 0 0  | 3 0                | 1 3  | 0 3   |  |

Fig. S1

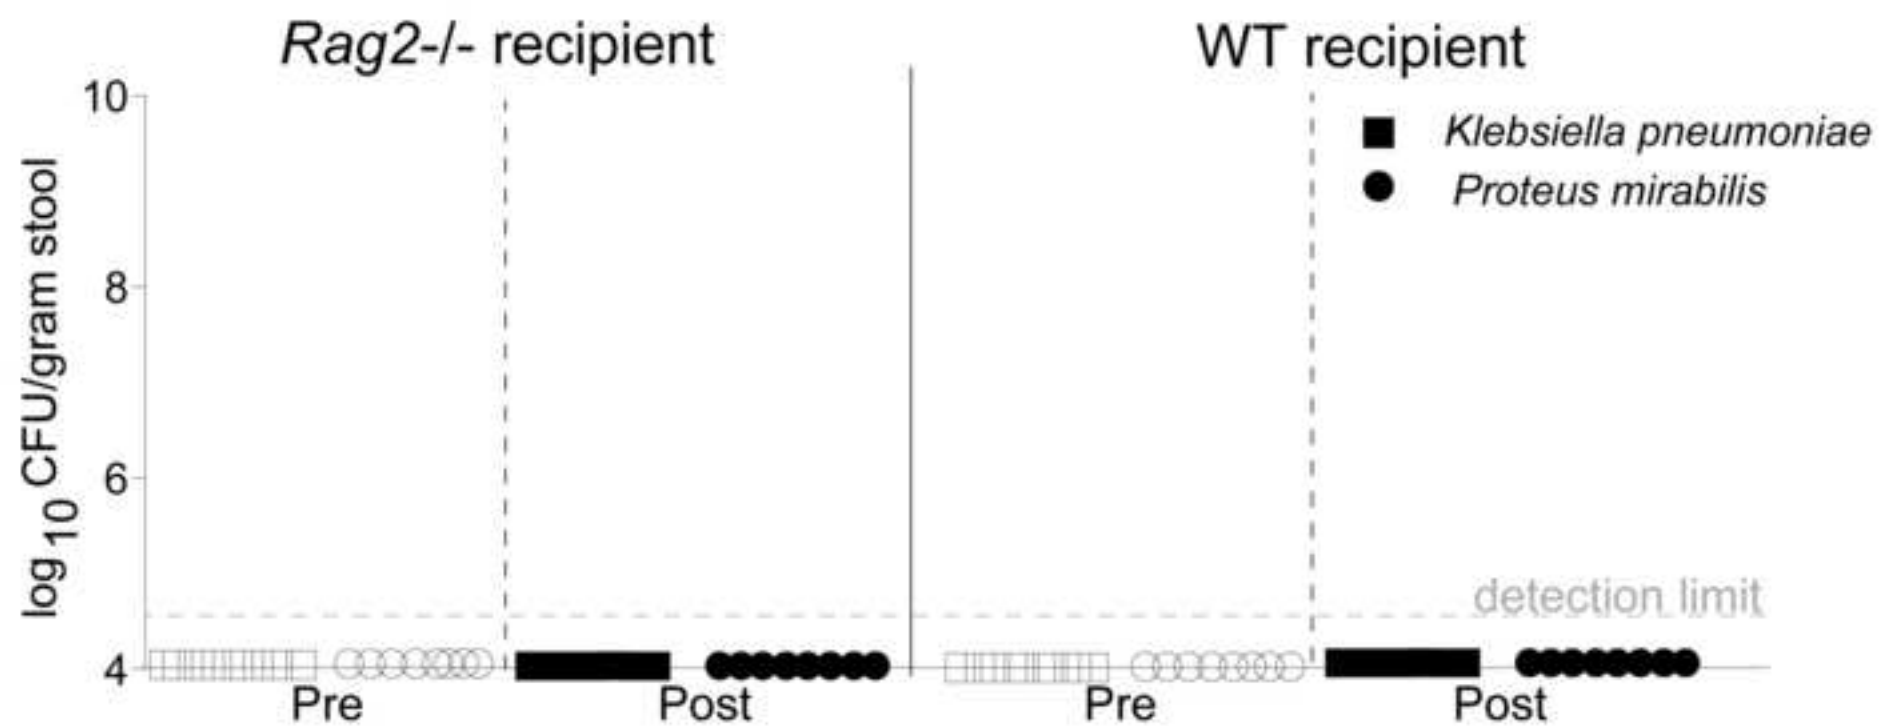

Fig. S2

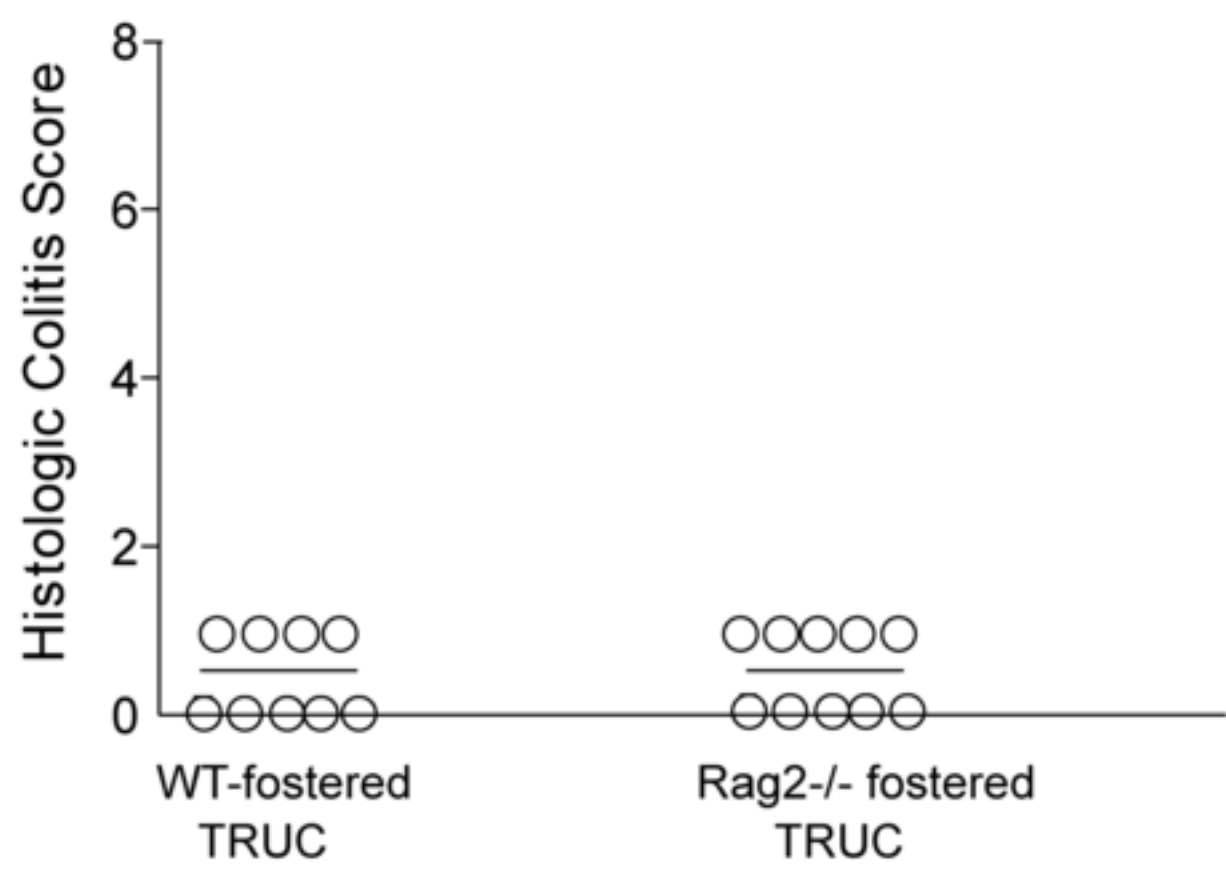

Fig. S3

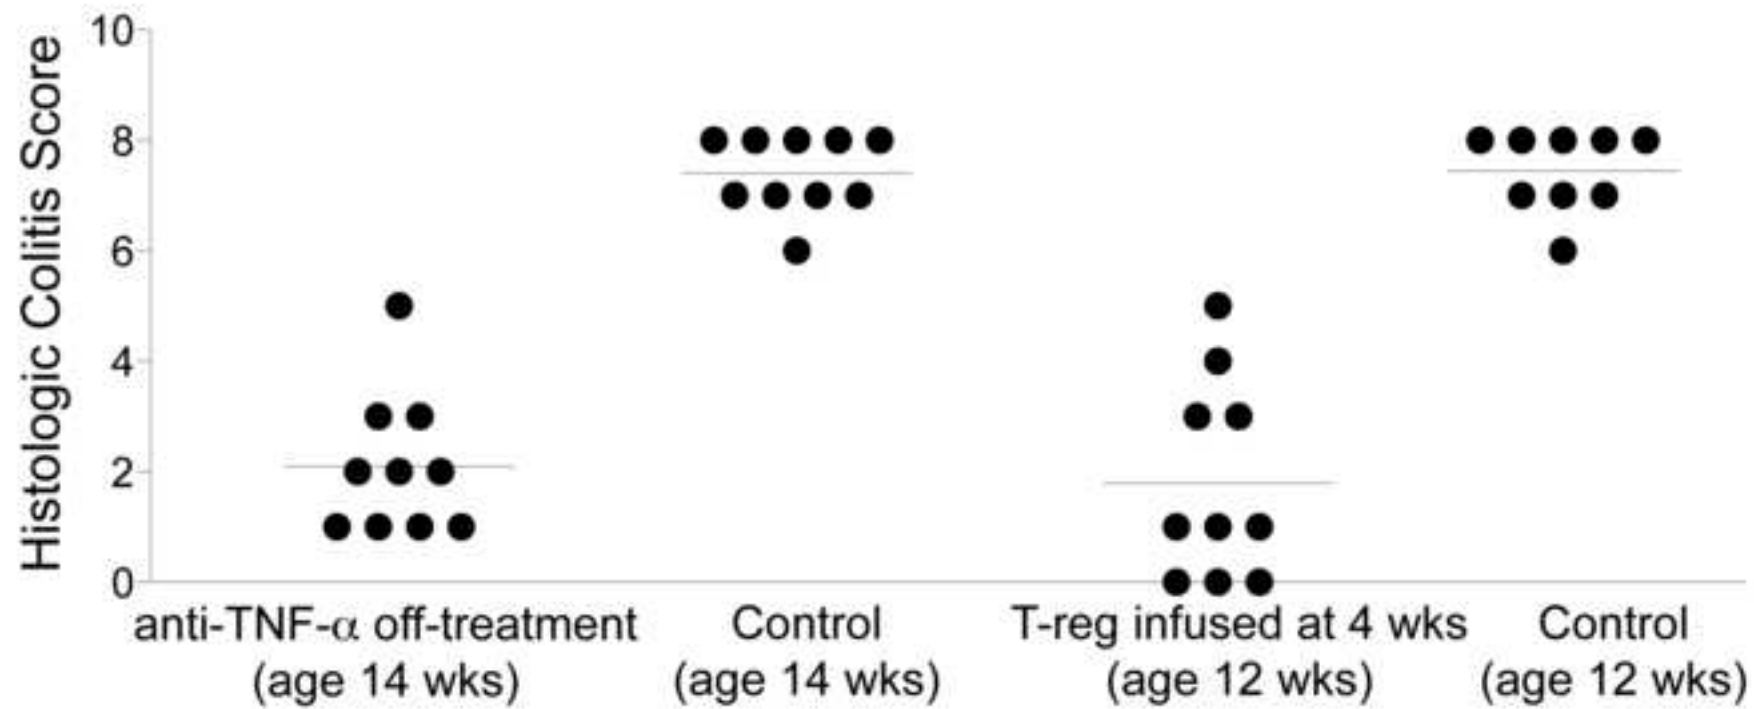

Fig. S4

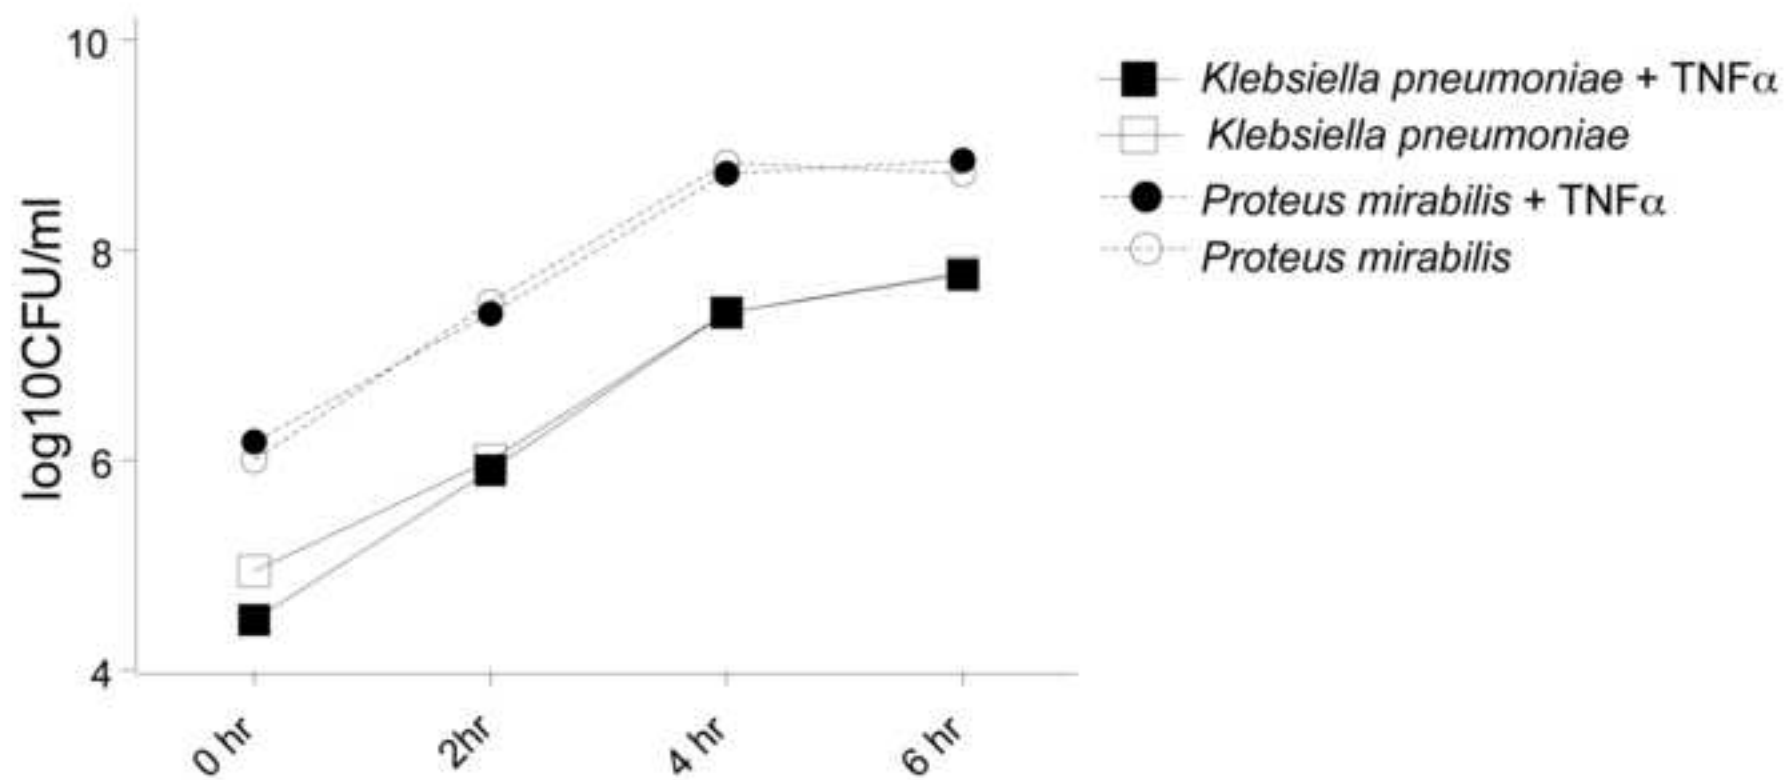

# Cell Host & Microbe Conflict of Interest Form

Cell Press, 600 Technology Square, 5th floor, Cambridge, MA 02139

**Please complete this form electronically and upload the file with your final submission.**

*Cell Host & Microbe* requires all authors to disclose any financial interest that might be construed to influence the results or interpretation of their manuscript.

As a guideline, any affiliation associated with a payment or financial benefit exceeding \$10,000 p.a. or 5% ownership of a company or research funding by a company with related interests would constitute a financial interest that must be declared. This policy applies to all submitted research manuscripts and review material.

Examples of statement language include: AUTHOR is an employee and shareholder of COMPANY; AUTHOR is a founder of COMPANY and a member of its scientific advisory board. This work was supported in part by a grant from COMPANY.

Please disclose any such interest below on behalf of all authors of this manuscript.

---

## **Please check one of the following:**

None of the authors of this manuscript have a financial interest related to this work.

Please print the following Disclosure Statement in the Acknowledgments section:  
LHG declares that she is a member of the Board of Directors of the Bristol Myers Squibb Corporation (BMSC) and holds equity in BMSC.

## **Please provide the following information:**

Please check this box to indicate that you have asked every author of this work to declare any conflicts of interest. Your answers on this form are on behalf of every author of this work.

Manuscript #: D-10-00053R3

Article Title: Research Article

Author List: Wendy S. Garrett, Carey A. Gallini, Tanya Yatsunenko, Monia Michaud, Andrea DuBois, Mary L. Delaney, Shivesh Punit, Maria Karlsson, Lynn Bry, Jonathan N. Glickman, Jeffrey I. Gordon, Andrew B. Onderdonk, Laurie H. Glimcher

Your Name: Wendy S. Garrett

Date: June 28<sup>th</sup>, 2010
